# Supplementary material for: Platelet‐derived extracellular vesicles are increased in sera of Alzheimer's disease patients, as revealed by Tim4‐based assays
Source: PubMed Central journal article supplement (PMC7931225; doi:10.1002/2211-5463.13068), 2021-02-03
Supplement: FEB4-11-741-s001.pdf [file FEB4-11-741-s001.pdf]

**Supplementary Table 1. List of sera from HDs and APs**

| Sample No. | ID         | Condition | Age | Sex    | MMSE |
|------------|------------|-----------|-----|--------|------|
| 1          | BRH1435559 | HD        | 26  | Male   | N/A  |
| 2          | BRH1435560 | HD        | 27  | Male   | N/A  |
| 3          | BRH1435561 | HD        | 34  | Male   | N/A  |
| 4          | BRH1435562 | HD        | 18  | Male   | N/A  |
| 5          | BRH1435563 | HD        | 24  | Male   | N/A  |
| 6          | BRH1435564 | HD        | 27  | Male   | N/A  |
| 7          | BRH1435565 | HD        | 33  | Male   | N/A  |
| 8          | BRH1435566 | HD        | 34  | Male   | N/A  |
| 9          | BRH1435567 | HD        | 29  | Male   | N/A  |
| 10         | BRH1435568 | HD        | 33  | Male   | N/A  |
| 11         | BRH1435569 | HD        | 28  | Female | N/A  |
| 12         | BRH1435570 | HD        | 33  | Female | N/A  |
| 13         | BRH1435571 | HD        | 44  | Female | N/A  |
| 14         | BRH1435572 | HD        | 26  | Female | N/A  |
| 15         | BRH1435573 | HD        | 37  | Female | N/A  |
| 16         | BRH1435574 | HD        | 36  | Female | N/A  |
| 17         | BRH1435575 | HD        | 39  | Female | N/A  |
| 18         | BRH1435576 | HD        | 32  | Female | N/A  |
| 19         | BRH1435577 | HD        | 18  | Female | N/A  |
| 20         | BRH1435578 | HD        | 28  | Female | N/A  |
| 21         | BRH1452812 | HD        | 66  | Male   | N/A  |
| 22         | BRH1452814 | HD        | 61  | Male   | N/A  |
| 23         | BRH1452815 | HD        | 66  | Male   | N/A  |
| 24         | BRH1452816 | HD        | 69  | Male   | N/A  |
| 25         | BRH1452817 | HD        | 68  | Male   | N/A  |
| 26         | BRH1452818 | HD        | 60  | Male   | N/A  |
| 27         | BRH1452819 | HD        | 60  | Male   | N/A  |
| 28         | BRH1452820 | HD        | 67  | Male   | N/A  |
| 29         | BRH1452821 | HD        | 60  | Male   | N/A  |
| 30         | BRH1441067 | AP        | 56  | Male   | 20   |
| 31         | BRH1441068 | AP        | 54  | Female | 20   |
| 32         | BRH1449536 | AP        | 48  | Male   | 21   |
| 33         | BRH1449538 | AP        | 63  | Male   | 21   |
| 34         | BRH1449537 | AP        | 55  | Female | 21   |
| 35         | BRH1449520 | AP        | 54  | Female | 19   |
| 36         | BRH1449519 | AP        | 65  | Male   | 20   |
| 37         | BRH1453755 | AP        | 54  | Female | 19   |

|    |            |    |    |        |    |
|----|------------|----|----|--------|----|
| 38 | BRH1453754 | AP | 65 | Male   | 20 |
| 39 | BRH1461098 | AP | 69 | Male   | 23 |
| 40 | HMN75708   | AP | 52 | Male   | 27 |
| 41 | HMN75709   | AP | 72 | Male   | 23 |
| 42 | HMN75710   | AP | 75 | Female | 26 |
| 43 | HMN75711   | AP | 60 | Male   | 24 |
| 44 | HMN75712   | AP | 84 | Male   | 28 |
| 45 | HMN75713   | AP | 64 | Male   | 26 |
| 46 | HMN75714   | AP | 68 | Female | 7  |
| 47 | HMN75715   | AP | 83 | Male   | 23 |
| 48 | HMN79957   | AP | 61 | Male   | 27 |
| 49 | HMN79955   | AP | 51 | Male   | 27 |

---

**Supplementary Table 2. Lectins used for lectin microarray<sup>1</sup>**

| Name             | Species                            | Origin        | Source <sup>3</sup> | Rough specificity <sup>2</sup>                                            |
|------------------|------------------------------------|---------------|---------------------|---------------------------------------------------------------------------|
| 1 LFA            | <i>Limax flavus</i>                | Natural       | EY Lab.             | Sia                                                                       |
| 2 WGA            | <i>Triticum vulgare</i>            | Natural       | EY Lab.             | (GlcNAc) <sub>n</sub> , polySia                                           |
| 3 PVL            | <i>Psathyrella velutina</i>        | Natural       | Wako                | Sia, GlcNAc                                                               |
| 4 MAL            | <i>Maackia amurensis</i>           | Natural       | Seikagaku           | α2-3Sia                                                                   |
| 5 MAH            | <i>Maackia amurensis</i>           | Natural       | Vector              | α2-3Sia                                                                   |
| 6 ACG            | <i>Agrocybe cylindracea</i>        | Natural       | JOM                 | α2-3Sia                                                                   |
| 7 rACG           | <i>Agrocybe cylindracea</i>        | <i>E.coli</i> | AIST                | α2-3Sia                                                                   |
| 8 rGal8N         | <i>Homo sapiens</i>                | <i>E.coli</i> | AIST                | α2-3Sia                                                                   |
| 9 SNA            | <i>Sambucus nigra</i>              | Natural       | Seikagaku           | α2-6Sia                                                                   |
| 10 SSA           | <i>Sambucus sieboldiana</i>        | Natural       | Vector              | α2-6Sia                                                                   |
| 11 TJAI          | <i>Trichosanthes japonica</i>      | Natural       | Vector              | α2-6Sia                                                                   |
| 12 rPSL1a        | <i>Polyporus squamosus</i>         | <i>E.coli</i> | AIST                | α2-6Sia                                                                   |
| 13 ADA           | <i>Allomyrina dictyoma</i>         | Natural       | JOM                 | α2-6Sia, Forssman, A, B                                                   |
| 14 PHAL          | <i>Phaseolus vulgaris</i>          | Natural       | Seikagaku           | GlcNAcβ1-6Man (tetraantenna)                                              |
| 15 DSA           | <i>Datura stramonium</i>           | Natural       | Seikagaku           | GlcNAcβ1-6Man (tetraantenna)                                              |
| 16 TxLcl         | <i>Tulipa gesneriana</i>           | Natural       | JOM                 | Galactosylated N-glycans up to triantenna                                 |
| 17 ECA           | <i>Erythrina cristagalli</i>       | Natural       | Seikagaku           | βGal                                                                      |
| 18 RCA120        | <i>Ricinus communis</i>            | Natural       | Vector              | βGal                                                                      |
| 19 rGal7         | <i>Homo sapiens</i>                | <i>E.coli</i> | AIST                | Type1 LacNAc, chondroitin polymer                                         |
| 20 rGal9N        | <i>Homo sapiens</i>                | <i>E.coli</i> | AIST                | GalNAcα1-4Gal (A), polyLacNAc                                             |
| 21 rGal9C        | <i>Homo sapiens</i>                | <i>E.coli</i> | AIST                | PolyLacNAc, branched LacNAc                                               |
| 22 rC14          | <i>Gallus gallus domesticus</i>    | <i>E.coli</i> | AIST                | Branched LacNAc                                                           |
| 23 rDiscoidin II | <i>Dictyostelium dicodeum</i>      | <i>E.coli</i> | AIST                | LacNAc, Galβ1-3GalNAc (T), GalNAc (Tn)                                    |
| 24 BPL           | <i>Bauhinia purpurea alba</i>      | Natural       | Vector              | Galβ1-3GlcNAc(GalNAc), α/βGalNAc                                          |
| 25 rCGL2         | <i>Homo sapiens</i>                | <i>E.coli</i> | AIST                | GalNAcα1-3Gal (A), polyLacNAc                                             |
| 26 PHAE          | <i>Phaseolus vulgaris</i>          | Natural       | Vector              | bisecting GlcNAc                                                          |
| 27 GSLII         | <i>Griffonia simplicifolia</i>     | Natural       | Vector              | GlcNAcβ1-4Man                                                             |
| 28 rSRL          | <i>Sclerotium rolfsii</i>          | <i>E.coli</i> | AIST                | Core1,3, agalacto N-glycan                                                |
| 29 UDA           | <i>Urtica dioica</i>               | Natural       | Vector              | (GlcNAc) <sub>n</sub>                                                     |
| 30 PWM           | <i>Phytolacca americana</i>        | Natural       | Vector              | (GlcNAc) <sub>n</sub>                                                     |
| 31 rF17AG        | <i>Escherichia coli</i>            | <i>E.coli</i> | AIST                | GlcNAc                                                                    |
| 32 rGRFT         | <i>Griffithia sp.</i>              | <i>E.coli</i> | AIST                | Man                                                                       |
| 33 NPA           | <i>Narcissus pseudonarcissus</i>   | Natural       | Seikagaku           | Manα1-3Man                                                                |
| 34 ConA          | <i>Canavalia ensiformis</i>        | Natural       | Vector              | M3, Manα1-2Manα1-3(Manα1-6)Man, GlcNAcβ1-2Manα1-3(Manα1-6)Man             |
| 35 GNA           | <i>Galanthus nivalis</i>           | Natural       | Vector              | Manα1-3Man, Manα1-6Man                                                    |
| 36 HHL           | <i>Hippeastrum hybrid</i>          | Natural       | Vector              | Manα1-3Man, Manα1-6Man                                                    |
| 37 ASA           | <i>Allium sativum</i>              | Natural       | JOM                 | Galβ1-4GlcNAcβ1-2Man                                                      |
| 38 DBAI          | <i>Dioscorea batatas</i>           | Natural       | JOM                 | High-man                                                                  |
| 39 CCA           | <i>Castanea crenata</i>            | Natural       | JOM                 | Galactosylated N-glycans up to triantenna                                 |
| 40 Heltuba       | <i>Helianthus tuberosus</i>        | Natural       | JOM                 | Manα1-3Man                                                                |
| 41 rHeltuba      | <i>Helianthus tuberosus</i>        | <i>E.coli</i> | AIST                | Manα1-3Man                                                                |
| 42 VVAII         | <i>Vicia villosa</i>               | Natural       | JOM                 | Man, agalacto                                                             |
| 43 rOrysata      | <i>Oryza sativa</i>                | <i>E.coli</i> | AIST                | Manα1-3Man, highman, biantenna                                            |
| 44 rPALa         | <i>Phlebotium aureum</i>           | <i>E.coli</i> | AIST                | Man5, biantenna                                                           |
| 45 rBanana       | <i>Musa acuminata</i>              | <i>E.coli</i> | AIST                | Manα1-2Manα1-3(6)Man                                                      |
| 46 rCalsepa      | <i>Calystegia sepium</i>           | <i>E.coli</i> | AIST                | Biantenna with bisecting GlcNAc                                           |
| 47 rRSL          | <i>Ralstonia solanacearum</i>      | <i>E.coli</i> | AIST                | αMan, α1-2Fuc (H), α1-3Fuc (Lex), α1-4Fuc (Lea)                           |
| 48 rBC2LA        | <i>Burkholderia cenocepacia</i>    | <i>E.coli</i> | AIST                | αMan, high-man                                                            |
| 49 AOL           | <i>Aspergillus oryzae</i>          | Natural       | Vector              | α1-2Fuc (H), α1-3Fuc (Le <sup>x</sup> ), α1-4Fuc (Le <sup>a</sup> )       |
| 50 AAL           | <i>Aleuria aurantia</i>            | Natural       | Vector              | α1-2Fuc (H), α1-3Fuc (Le <sup>x</sup> ), α1-4Fuc (Le <sup>a</sup> )       |
| 51 rAAL          | <i>Aleuria aurantia</i>            | <i>E.coli</i> | AIST                | α1-2Fuc (H), α1-3Fuc (Le <sup>x</sup> ), α1-4Fuc (Le <sup>a</sup> )       |
| 52 rPAIIL        | <i>Pseudomonas aeruginosa</i>      | <i>E.coli</i> | AIST                | αMan, α1-2Fuc (H), α1-3Fuc (Le <sup>x</sup> ), α1-4Fuc (Le <sup>a</sup> ) |
| 53 rRSIIL        | <i>Ralstonia solanacearum</i>      | <i>E.coli</i> | AIST                | α1-2Fuc (H), α1-3Fuc (Le <sup>x</sup> ), α1-4Fuc (Le <sup>a</sup> )       |
| 54 rPTL          | <i>Pholiota terrestris</i>         | <i>E.coli</i> | AIST                | α1-6Fuc                                                                   |
| 55 PSA           | <i>Pisum sativum</i>               | Natural       | Seikagaku           | α1-6Fuc up to biantenna                                                   |
| 56 LCA           | <i>Lens culinaris</i>              | Natural       | Vector              | α1-6Fuc up to biantenna                                                   |
| 57 rAOL          | <i>Aspergillus oryzae</i>          | <i>E.coli</i> | AIST                | α1-2Fuc (H), α1-3Fuc (Le <sup>x</sup> ), α1-4Fuc (Le <sup>a</sup> )       |
| 58 rBC2LCN       | <i>Burkholderia cenocepacia</i>    | <i>E.coli</i> | AIST                | Fucα1-2Galβ1-3GlcNAc/GalNAc                                               |
| 59 LTL           | <i>Lotus tetragonolobus</i>        | Natural       | Seikagaku           | Le <sup>x</sup> , Le <sup>y</sup>                                         |
| 60 UEAI          | <i>Ulex europaeus</i>              | Natural       | Vector              | α1-2Fuc                                                                   |
| 61 TJAI          | <i>Trichosanthes japonica</i>      | Natural       | Vector              | α1-2Fuc                                                                   |
| 62 MCA           | <i>Momordica charantia</i>         | Natural       | JOM                 | α1-2Fuc                                                                   |
| 63 GSLI          | <i>Griffonia simplicifolia</i>     | Natural       | Seikagaku           | αGalNAc (A, Tn), αGal (B)                                                 |
| 64 PTLI          | <i>Psophocarpus tetragonolobus</i> | Natural       | Tokyo Kasei         | αGalNAc (A, Tn)                                                           |
| 65 GSLIA4        | <i>Griffonia simplicifolia</i>     | Natural       | EY Lab.             | αGalNAc (A, Tn)                                                           |
| 66 rGC2          | <i>Geodia cydonium</i>             | <i>E.coli</i> | AIST                | α1-2Fuc (H), αGalNAc (A), αGal (B)                                        |
| 67 GSLIB4        | <i>Griffonia simplicifolia</i>     | Natural       | Vector              | αGal (B)                                                                  |
| 68 rMOA          | <i>Marasmius oreades</i>           | <i>E.coli</i> | AIST                | αGal (B)                                                                  |
| 69 EEL           | <i>Euonymus europaeus</i>          | Natural       | Vector              | αGal (B)                                                                  |
| 70 rPAIL         | <i>Pseudomonas aeruginosa</i>      | <i>E.coli</i> | AIST                | α,βGal, αGalNAc (Tn)                                                      |
| 71 LEL           | <i>Lycopersicon esculentum</i>     | Natural       | Vector              | Polylactosamine, (GlcNAc) <sub>n</sub>                                    |
| 72 STL           | <i>Solanum tuberosum</i>           | Natural       | Seikagaku           | Polylactosamine, (GlcNAc) <sub>n</sub>                                    |

|                     |                                |               |           |                                                 |
|---------------------|--------------------------------|---------------|-----------|-------------------------------------------------|
| 73 rGal3C           | <i>Homo sapiens</i>            | <i>E.coli</i> | AIST      | LacNAc, polylectosamine                         |
| 74 rLSLN            | <i>Laetiporus sulphureus</i>   | <i>E.coli</i> | AIST      | LacNAc, polylectosamine                         |
| 75 rCGL3            | <i>Coprinopsis cinerea</i>     | <i>E.coli</i> | AIST      | LacDiNAc                                        |
| 76 PNA              | <i>Arachis hypogaea</i>        | Natural       | Vector    | Gal $\beta$ 1-3GalNAc (T)                       |
| 77 ACA              | <i>Amaranthus caudatus</i>     | Natural       | Vector    | Gal $\beta$ 1-3GalNAc (T)                       |
| 78 HEA              | <i>Hericium erinaceum</i>      | Natural       | JOM       | Gal $\beta$ 1-3GalNAc (T)                       |
| 79 ABA              | <i>Agarics bisporus</i>        | Natural       | Vector    | Gal $\beta$ 1-3GalNAc (T), GlcNAc               |
| 80 Jacalin          | <i>Artocarpus integrifolia</i> | Natural       | Seikagaku | Gal $\beta$ 1-3GalNAc (T), GalNAc $\alpha$ (Tn) |
| 81 MPA              | <i>Maclura pomifera</i>        | Natural       | Seikagaku | Gal $\beta$ 1-3GalNAc (T), GalNAc $\alpha$ (Tn) |
| 82 HPA              | <i>Helix pomatia</i>           | Natural       | Seikagaku | $\alpha$ GalNAc (A, Tn)                         |
| 83 VVA              | <i>Vicia villosa</i>           | Natural       | Vector    | $\alpha$ , $\beta$ GalNAc (A, Tn, LacDiNAc)     |
| 84 DBA              | <i>Dolichos biflorus</i>       | Natural       | Vector    | $\alpha$ , $\beta$ GalNAc (A, Tn, LacDiNAc)     |
| 85 SBA              | <i>Glycine max</i>             | Natural       | EY Lab.   | $\alpha$ , $\beta$ GalNAc (A, Tn, LacDiNAc)     |
| 86 rPPL             | <i>Pleurocybella porrigens</i> | <i>E.coli</i> | AIST      | $\alpha$ , $\beta$ GalNAc (A, Tn, LacDiNAc)     |
| 87 rCNL             | <i>Clitocybe nebularis</i>     | <i>E.coli</i> | AIST      | $\alpha$ , $\beta$ GalNAc (A, Tn, LacDiNAc)     |
| 88 rXCL             | <i>Xerocomus chrysenteron</i>  | <i>E.coli</i> | AIST      | Core1,3, agalacto N-glycan                      |
| 89 VVA I            | <i>Vicia villosa</i>           | Natural       | JOM       | GalNAc $\beta$ 1-3(4)Gal                        |
| 90 WFA              | <i>Wisteria floribunda</i>     | Natural       | Vector    | Terminal GalNAc, LacDiNAc                       |
| 91 rABA             | <i>Agarics bisporus</i>        | <i>E.coli</i> | AIST      | Gal $\beta$ 1-3GalNAc (T), GlcNAc               |
| 92 rDiscoidin I     | <i>Dictyostelium Discodeum</i> | <i>E.coli</i> | AIST      | Gal                                             |
| 93 DBAIII           | <i>Dioscorea batatas</i>       | Natural       | JOM       | Maltose                                         |
| 94 rMalectin        | <i>Homo sapiens</i>            | <i>E.coli</i> | AIST      | Glc $\alpha$ 1-2Glc                             |
| 95 CSA              | <i>Oncorhynchus keta</i>       | Natural       | JOM       | Rhamnose, Gal $\alpha$ 1-4Gal                   |
| 96 FLAG-EW29Ch-E20k | <i>Lumbricus terrestris</i>    | <i>E.coli</i> | AIST      | 6-sulfo-Gal                                     |

<sup>1</sup>Abbreviations: Gal (D-galactose), GalNAc (N-acetyl-galactosamine), GlcNAc (N-acetyl-glucosamine), Fuc (L-fucose), Glc (D-glucose), Sia (Sialic acid), LacNAc (N-acetyl-lactosamine).

<sup>2</sup>Specificity data was obtained by frontal affinity chromatography and glycoconjugate microarray.

<sup>3</sup>Abbreviations: JOM (J-OIL MILLS, INC), Vector (VECTOR LABORATORIES, INC), Seikagaku (SEIKAGAKU CORPORATION), EY (EY LABORATORIES, INC), AIST (National Institute of Advanced Industrial Science and Technology)

**Supplementary Table.3 Identification of rPALA-precipitated glycoproteins at 80 kDa by LC-MS/MS**

| Uniprot Accession number | Protein name                                 | Molecular weight | Number of peptides <sup>a</sup> | Number of unique peptides <sup>b</sup> | Sequence Coverage (%) <sup>c</sup> | Spectral counting in HD <sup>d</sup> | Spectral counting in AP <sup>d</sup> |
|--------------------------|----------------------------------------------|------------------|---------------------------------|----------------------------------------|------------------------------------|--------------------------------------|--------------------------------------|
| Q14624 ITIH4_HUMAN       | Inter-alpha-trypsin inhibitor heavy chain H4 | 103357           | 12                              | 12                                     | 14                                 | 2                                    | 15                                   |
| P05106 ITB3_HUMAN        | Integrin beta-3                              | 87058            | 11                              | 11                                     | 15                                 | 9                                    | 13                                   |
| P25311 ZA2G_HUMAN        | Zinc-alpha-2-glycoprotein                    | 34259            | 7                               | 7                                      | 26                                 | 0                                    | 8                                    |
| P80188 NGAL_HUMAN        | Neutrophil gelatinase-associated lipocalin   | 22588            | 2                               | 2                                      | 12                                 | 0                                    | 2                                    |
| P16671 CD36_HUMAN        | Platelet glycoprotein 4                      | 53053            | 4                               | 4                                      | 8                                  | 0                                    | 4                                    |
| P0C0L5 CO4B_HUMAN        | Complement C4-B                              | 192750           | 2                               | 2                                      | 1                                  | 0                                    | 2                                    |
| P0C0L4 CO4A_HUMAN        | Complement C4-A                              | 192784           | 2                               | 2                                      | 1                                  | 0                                    | 2                                    |
| P05120 PAI2_HUMAN        | Plasminogen activator inhibitor 2            | 46596            | 2                               | 2                                      | 5                                  | 0                                    | 2                                    |
| P04114 APOB_HUMAN        | Apolipoprotein B-100                         | 515611           | 2                               | 2                                      | 0                                  | 0                                    | 2                                    |
| Q5T749 KPRP_HUMAN        | Keratinocyte proline-rich protein            | 64136            | 2                               | 2                                      | 2                                  | 0                                    | 2                                    |
| P36952 SPB5_HUMAN        | Serpin B5 OS=Homo sapiens                    | 42100            | 2                               | 2                                      | 6                                  | 0                                    | 2                                    |

<sup>a</sup>The number of identified peptides

<sup>b</sup>The number of identified peptides, which contain specific sequence for each protein.

<sup>c</sup>The ratio of the sequence of identified peptides to whole sequence of each protein.

<sup>d</sup>The number of spectrums which were used for identification of proteins

**Supplementary Table 4. Spearman's rank correlation coefficient between the values of sandwich assays and ages in HDs and APs**

|                     |                   | HD     | AP     |
|---------------------|-------------------|--------|--------|
| Tim4- $\alpha$ CD63 | <i>p-value</i>    | 0.668  | 0.421  |
|                     | Spearman's $\rho$ | -0.083 | -0.191 |
| Tim4- $\alpha$ CD9  | <i>p-value</i>    | 0.041  | 0.870  |
|                     | Spearman's $\rho$ | 0.382  | -0.039 |
| Tim4- $\alpha$ CD41 | <i>p-value</i>    | 0.564  | 0.830  |
|                     | Spearman's $\rho$ | 0.112  | 0.051  |
| Tim4- $\alpha$ CD61 | <i>p-value</i>    | 0.107  | 0.582  |
|                     | Spearman's $\rho$ | 0.306  | 0.131  |
| Tim4- $\alpha$ CD81 | <i>p-value</i>    | 0.046  | 0.813  |
|                     | Spearman's $\rho$ | 0.374  | 0.057  |

**Supplementary Table 5. Spearman's rank correlation coefficient among Tim4-based sandwich assays**

|                     | Tim4- $\alpha$ CD9 | Tim4- $\alpha$ CD41 | Tim4- $\alpha$ CD61 | Tim4- $\alpha$ CD63 | Tim4- $\alpha$ CD81 |
|---------------------|--------------------|---------------------|---------------------|---------------------|---------------------|
| Tim4- $\alpha$ CD9  | 1.00 <sup>a</sup>  | 0.82                | 0.79                | 0.61                | 0.53                |
| Tim4- $\alpha$ CD41 | 0.82               | 1.00                | 0.91                | 0.69                | 0.26                |
| Tim4- $\alpha$ CD61 | 0.79               | 0.91                | 1.00                | 0.63                | 0.24                |
| Tim4- $\alpha$ CD63 | 0.61               | 0.69                | 0.63                | 1.00                | 0.33                |
| Tim4- $\alpha$ CD81 | 0.53               | 0.26                | 0.24                | 0.33                | 1.00                |

*Red*: high correlation, *blue*: low correlation

<sup>a</sup>Spearman's  $\rho$

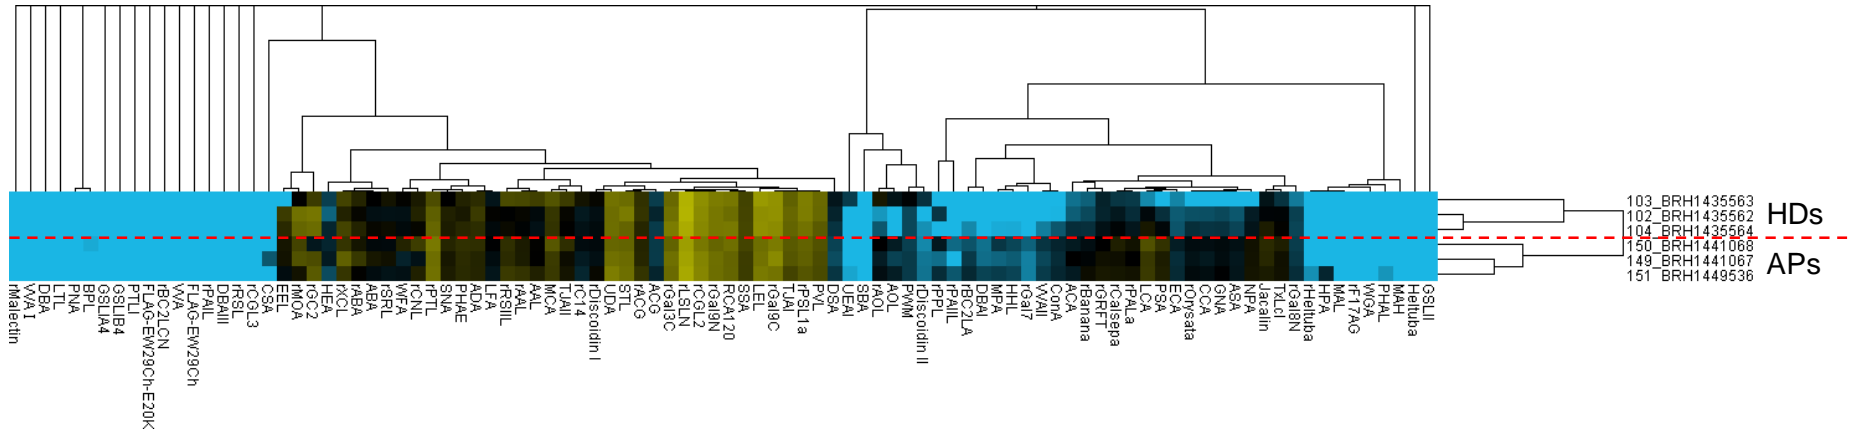

**Supplementary Figure. 1 Cluster analysis of lectin microarray data of EVs purified from sera of HDs and APs.**

Lectin microarray data of EVs purified from sera of APs (n = 3) and HDs (n = 3) were normalized, log-transformed, and analyzed by Cluster 3.0 with average linkage methods. The zero value of lectin signal was converted to 1. Sample No.4, 5, 6 for HDs and No.30, 31, 32 for APs were used in Supplementary Table 1. *yellow*: high, *blue*: low



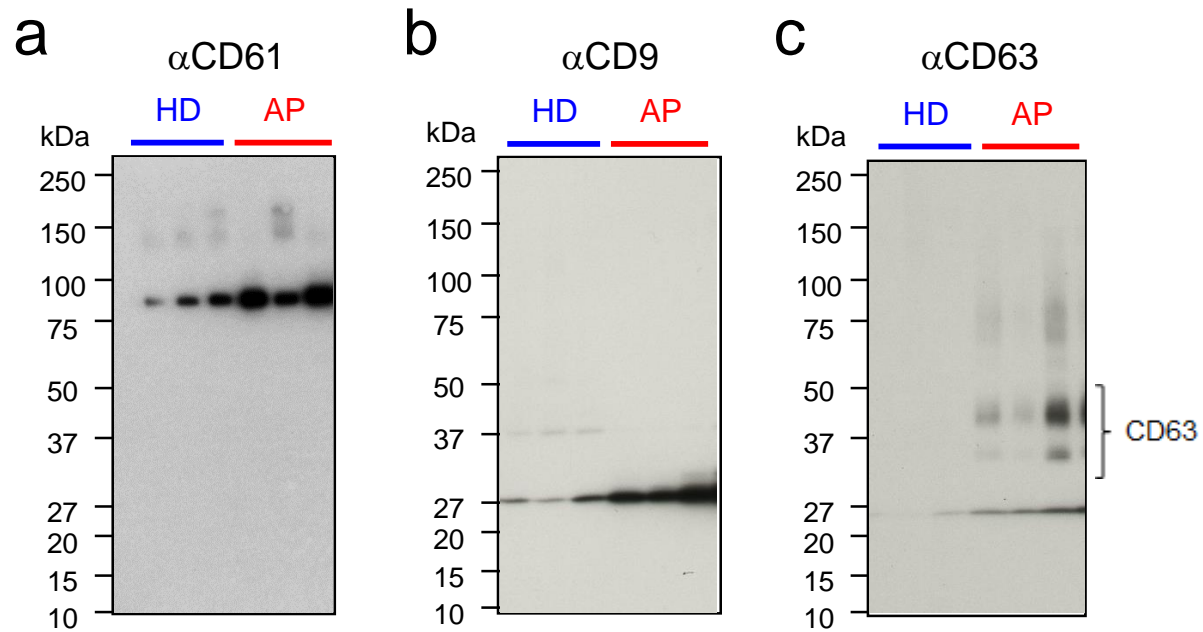

**Supplementary Figure 2. Western blotting of HD- and AP-derived EVs.** Equal amount of proteins (0.2  $\mu$ g) of purified HD- and AP-derived EVs were separated on SDS-PAGE and blotted with  $\alpha$ CD61 (a),  $\alpha$ CD9 (b) and  $\alpha$ CD63 (c). Lane 1: sample No. 4, lane 2: No. 5, lane 3: No. 6, lane 4: No. 30, lane 5: No. 31, lane 6: No. 32.

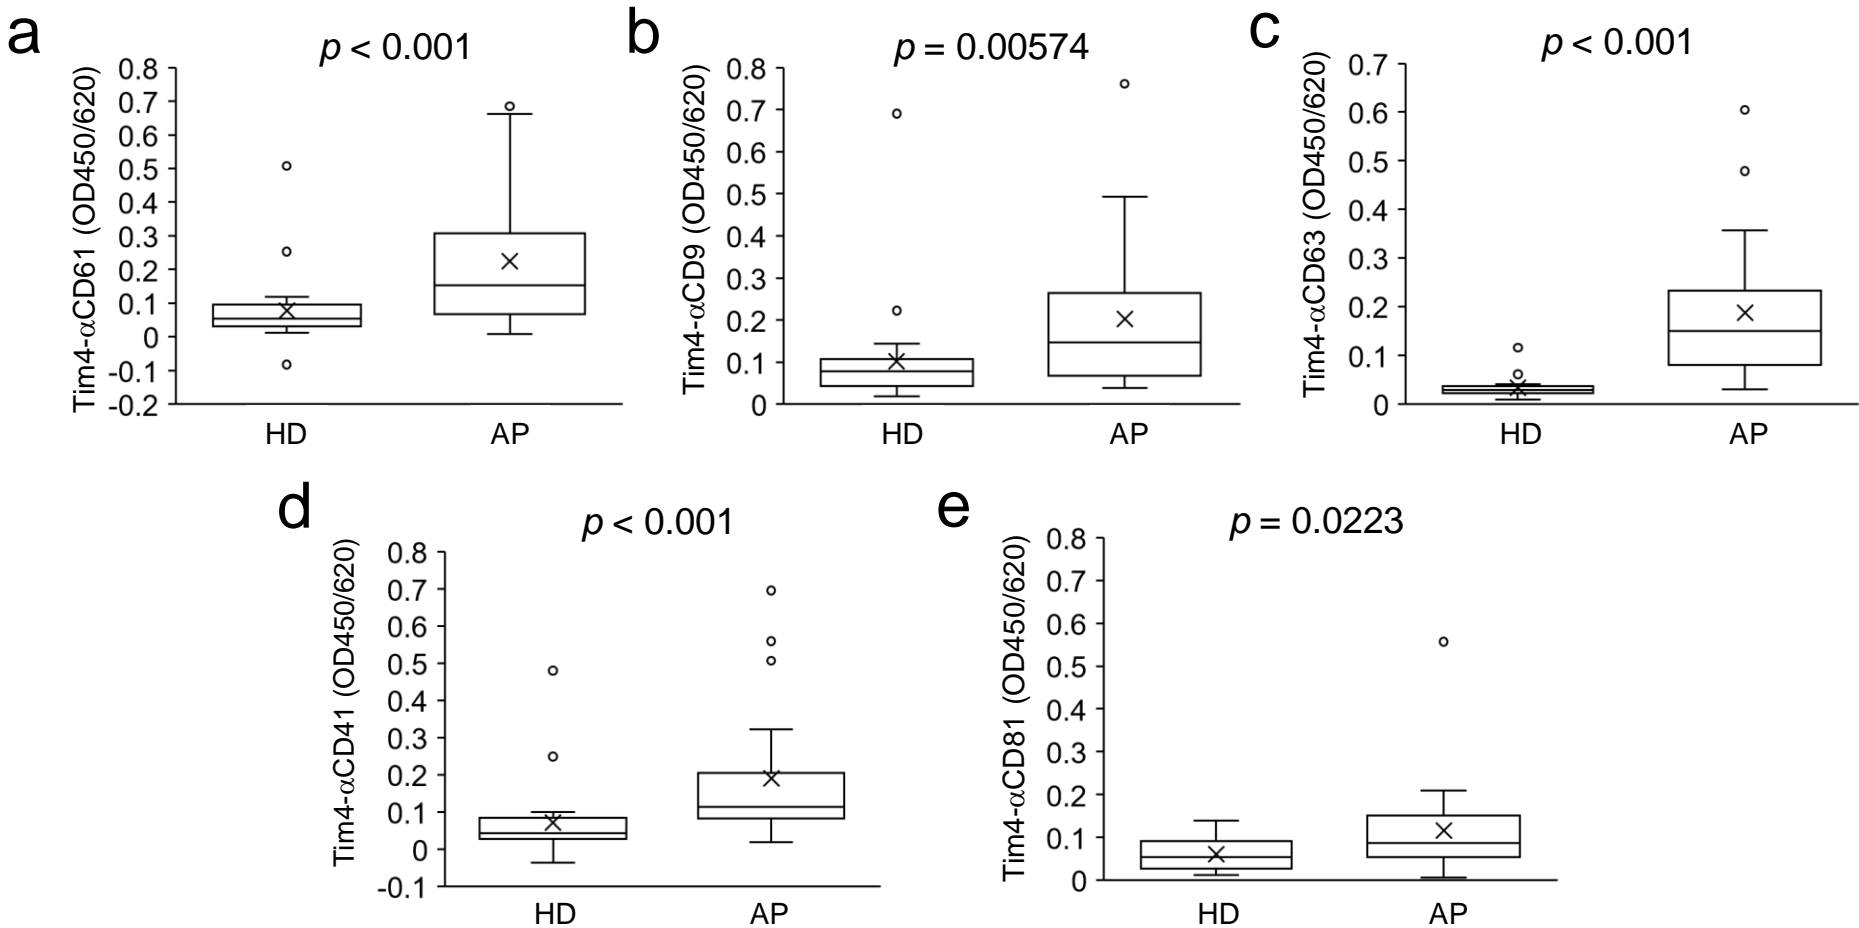

**Supplementary Figure. 3 Quantitative analysis of HD- and AP-derived EVs using Tim4-based sandwich assays in whole cohort.**

Box-whisker plots of the data of whole cohort (HDs:  $n = 29$ , APs:  $n = 20$ ) analyzed by sandwich assays using immobilized Tim4 and overlay antibodies against CD61 (a), CD9 (b), CD63 (c), CD41 (d), and CD81 (e). OD: optical density. Sera used in this study are listed in Supplementary Table 1.  $P$ -values obtained by Wilcoxon-Mann-Whitney Test are indicated in the figure.

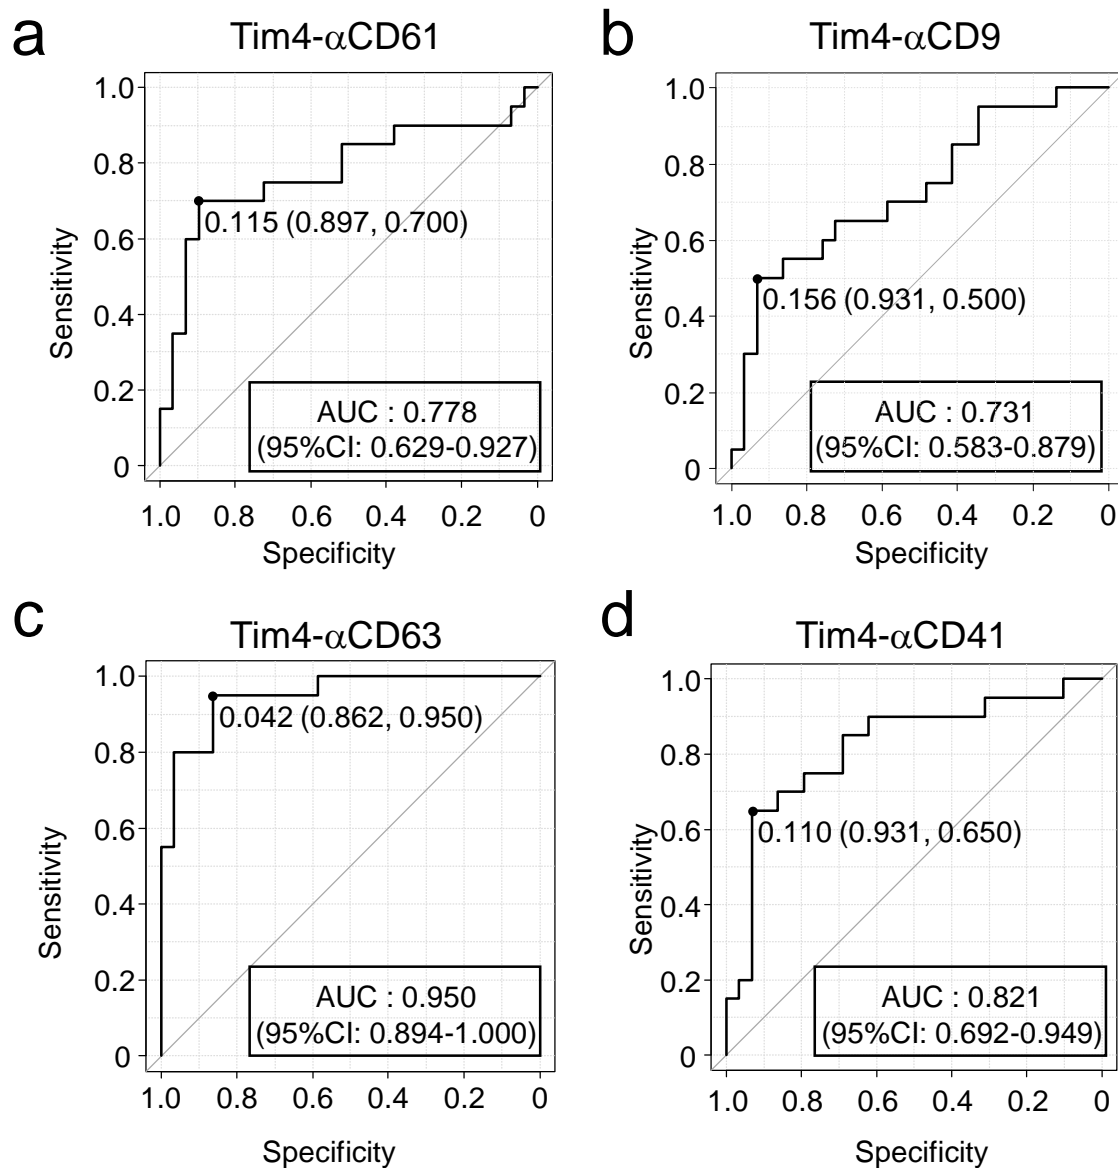

**Supplementary Figure. 4 ROC curves of the values obtained by Tim4-based sandwich assays in whole cohort.**

ROC curves for predicting AD risk by OD values obtained by sandwich assays (HDs: n = 29, APs: n = 20) using Tim4 and antibodies against CD61 (a), CD9 (b), CD63 (c), and CD41(d). Area-under-curve (AUC) and its 95% confidence interval (CI) are indicated in the figure.
